# Supplementary material for: The Evolutionary Portrait of Metazoan NAD Salvage
Source: PLoS One. 2013 May 28;8(5):e64674. doi: 10.1371/journal.pone.0064674 (PMC3665594; doi:10.1371/journal.pone.0064674)
Supplement: Table S2 — EST sequences of NAMPT and PNC. The table lists the species with available EST data and the associated identifier and source. (XLSX) [file pone.0064674.s012.xlsx]

## Sheet: S2
Table S2. EST sequences of NAMPT and PNC.
The table lists the species with available EST data and the associated identifier and source.
Species		ID	Dev. Stage	Source
B. floridae	PNC	bflv011j05	36 hr larvae	http://amphioxus.icob.sinica.edu.tw/
	NAMPT	bfga038e11	gastrula, neurula	http://amphioxus.icob.sinica.edu.tw/
S. purpuratus	PNC	WHL22.88771.0	embryos, larvae (0-72 hr)	http://www.spbase.org/SpBase/rnaseq/bin/query.html
	NAMPT	WHL22.521505.0	embryos, larvae (0-72 hr)	http://www.spbase.org/SpBase/rnaseq/bin/query.html
N. vectensis	PNC	Nve.21423	unfertilized eggs to primary polyps; whole embryo	http://www.ncbi.nlm.nih.gov/unigene
