# Supplementary material for: The Evolutionary Portrait of Metazoan NAD Salvage
Source: PLoS One. 2013 May 28;8(5):e64674. doi: 10.1371/journal.pone.0064674 (PMC3665594; doi:10.1371/journal.pone.0064674)
Supplement: Table S4 — PDBs used as reference and grid parameters for the docking calculations. (XLSX) [file pone.0064674.s014.xlsx]

## Sheet: S4
Table S4. PDBs used as templates to build the protein models and reference PDBs chosen with grid parameters for the docking calculations.
		Docking
	Modeling templates	Grid Center (mean of C2-C5 atoms distance ligand)	Grid Size (Å)	PDB id	References
NAMPT	2E5B, 2E5C, 2E5D; 2GVJ; 3DKJ (H. sapiens);	X=10.54	30x25x40	2E5D (H. sapiens)	Takahashi et al. 2010
	2H3D (M. musculus);	Y=-9.25
	2G95, 2G96, 2G97; 3G8E (R. norvegicus)	Z=38.78
PNC	2WT9, 2WTA (A. baumanii); 1ILW, 1IM5 (P. horikoshii);	X=25.127	35x35x40	3R2J (L. infantum)	Gazanion et al. 2011
	2H0R (S. cerevisiae); 3R2J (L. infantum);	Y=−0.983
	3PL1 (M. tuberculosis); 3O90 (S. pneumoniae)	Z=21.264
