# Supplementary material for: The Evolutionary Portrait of Metazoan NAD Salvage
Source: PLoS One. 2013 May 28;8(5):e64674. doi: 10.1371/journal.pone.0064674 (PMC3665594; doi:10.1371/journal.pone.0064674)
Supplement: Table S5 — Residue positions for each species that correspond to the reference residues (NAMPT PDB id 2E5D and PNC PDB id 3R2J) of the alignment used to model the proteins. (XLSX) [file pone.0064674.s015.xlsx]

## Sheet: S5
Table S5. Residue positions for each species that correspond to the reference residues (NAMPT PDB id 2E5D and PNC PDB id 3R2J) of the alignment used to model the proteins.
Reference molecule	B. floridae	C. teleta	N. vectensis	S. purpuratus
NAMPT (2E5D)
Asp 16 (chain A)	Asp 9 (chain A)	Asp 16 (chain A)	Asp 15 (chain A)	Asp 17 (chain A)
Tyr 18 (chain A)	Tyr 11 (chain A)	Tyr 18 (chain A)	Tyr 17 (chain A)	Tyr 19 (chain A)
Phe 193 (chain B)	Phe 176 (chain B)	Phe 183 (chain B)	Phe 182 (chain B)	Phe 184 (chain B)
Arg 196 (chain B)	Arg 179 (chain B)	Arg 186 (chain B)	Arg 185 (chain B)	Arg 187 (chain B)
Asp 219 (chain B)	Asp 202 (chain B)	Asp 209 (chain B)	Asp 208 (chain B)	Asp 210 (chain B)
Arg 311 (chain B)	Arg 293 (chain B)	Arg 300 (chain B)	Arg 298 (chain B)	Arg 301 (chain B)
Active site (3R2J)
Leu 44	Leu 27	Met 27	Leu 16	Leu27
Val 46	Val 29	Ile 29	Leu 18	Leu29
Trp 91	Trp110	Trp110	Trp99	Trp106
Tyr 131	Tyr147	Tyr147	Tyr137	Tyr143
Ala 163	Ala179	Ala179	Ala169	Ala175
Tyr 166	Val182	Val182	Tyr172	Val178
Val 186	Val208	Val208	Ile198	Gln204
Catalytic (3R2J)
Asp 32	Asp17	Asp17	Asp6	Asp17
Lys 117	Lys138	Lys138	Lys128	Lys134
Cys 161	Cys183	Cys183	Cys173	Cys179
