# Supplementary material for: The Evolutionary Portrait of Metazoan NAD Salvage
Source: PLoS One. 2013 May 28;8(5):e64674. doi: 10.1371/journal.pone.0064674 (PMC3665594; doi:10.1371/journal.pone.0064674)
Supplement: Table S6 — Oligonucleotide sequences used for amplification of NAMPT and PNC from B. floridae , S. purpuratus , C. teleta and N. vectensis . (XLSX) [file pone.0064674.s016.xlsx]

## Sheet: S6
Table S6. Oligonucleotide sequences used for amplification of NAMPT and PNC from B. floridae, S. purpuratus, C. teleta and N. vectensis.
Species	Gene	Forward primer	Reverse primer	AT
		(5’-3’)	(5’-3’)	(ºC)
B. floridae	PNC	CTCATAGTGGTGGACATGCA	CAGAATGCCGAGTAACTGTC	58
	NAMPT	CATCACGGACTCCTACAAGG	TTGCGATCGTGTCTGTCCC	59
S. purpuratus	PNC	CCTCATAGCAGTAGATGTAC	GCAGAATAGCTGTCGACATG	52
	NAMPT	GACGGTTCTTACAAGGTCAC	CCTGCTATGGTGTCTGTTCC	59
C. teleta	PNC	ATTGGTAATCGTGGACGTGC	AGAACGCTGAGTAGCTGTC	62
	NAMPT	CCTATAAGGTGACCCATCAC	CATAGTACTTGCGAGCCGTC	62
N. vectensis	PNC	CCTGATAGTTGTTGATGTACA	AGAAGGCAGAGTAGCTGTC	60
	NAMPT	CGGATTCGTACAAGGTCTCC	CAGCTATCGTGTCTGTGCC	62
